# Supplementary material
Source: HighWire-hosted journal article supplement (https://bmjopen.bmj.com/content/13/12/e075470)
Supplement: inline-supplementary-material-2 [file inline-supplementary-material-2.pdf]

## Supplementary Material File 2: Codebook for Assessing Conditions for Effective Communication Amongst Interdisciplinary Teams in Surgical Intensive Care Units

|                                    |
|------------------------------------|
| <b>Code</b>                        |
| <b>Psychological safety</b>        |
| Social norms                       |
| Relationships                      |
| Attendings not used to pushback    |
| Excluded in discussions            |
| Chance to ask questions            |
| Valued opinions                    |
| Status                             |
| Hierarchy                          |
| Cognitive bias                     |
| Respect                            |
| <b>Ownership</b>                   |
| Deferring decisions                |
| Delegation                         |
| Responsiveness                     |
| Attending preferences              |
| Primary team gives approval        |
| Anticipatory thinking              |
| <b>Communication</b>               |
| Agreement on care plan             |
| Changing plans                     |
| Inter/intrapersonal                |
| Formality                          |
| Mode                               |
| Assignment of a calling consultant |
| Fast decision-making               |
| <b>Handoffs</b>                    |
| Shift to shift handoffs            |
| Floor to SICU handoffs             |
| <b>Speaking up</b>                 |
| Going directly to top of hierarchy |
| <b>Rounds</b>                      |
| Rounding at different times        |
| Pre-rounding                       |
| Post-rounding                      |
| Work organization                  |
| Morning rounds                     |
| <b>Communication with family</b>   |

|                                                 |
|-------------------------------------------------|
| More consultants, more mixed messages to family |
| Need to smooth over confusion with family       |
| Conflicting messages between teams              |
| Tone                                            |
| Updates                                         |
| Variability in mechanism of communication       |
| Regular interactions                            |
| <b>Communication tools</b>                      |
| Notes                                           |
| WhatsApp                                        |
| Texting group chats                             |
| <b>Roles and responsibilities</b>               |
| <b>Role definition</b>                          |
| Role of APP                                     |
| Point person                                    |
| Mediating person                                |
| Constant in ICU                                 |
| Advocate for attending                          |
| <b>Role of 2nd year</b>                         |
| Team manager                                    |
| Psychological accessibility                     |
| Physical accessibility                          |
| Cognitive load                                  |
| SICU - NIGHT                                    |
| SICU - DAY                                      |
| Managing expectations                           |
| Rotations                                       |
| Staffing                                        |
